# Supplementary material for: Knowledge, attitudes, and utilization of mental health services among undergraduates at the University of Lagos, Nigeria: a cross-sectional study
Source: Research Square preprint supplement (doi:10.21203/rs.3.rs-6335742/v1), 2025-05-09
Supplement: Supplementary file 1 [file fc9ed7eb9e54b470b4f65a34.docx]

**APPENDIX 1**

**INFORMATION FOR CONSENT**

**Title of Research**: Knowledge, attitude, and utilization of mental health services among undergraduates at the University of Lagos, Nigeria: a cross-sectional study.

**Purpose of Research:** To determine the level of knowledge, attitude and utilization of mental health services among undergraduates in the University of Lagos, Nigeria.

**Research Procedure:** If you choose to participate, a questionnaire was administered to you with the purpose of obtaining some demographic information and details about your knowledge, attitude and level of utilization of mental health services.

**Benefits of the Research:** It is anticipated that this study will assess the knowledge and attitude of undergraduates in the University of Lagos towards mental health services and determine the level of utilization of mental health services. This will provide data that can improve healthcare planning, policy formulation and provide information about the level of knowledge, attitude and utilization of mental health services among undergraduates in the University of Lagos, Nigeria

**Potential Risks:** There are no possible risks, discomforts, or inconveniences associated with this study, as participants are only required to fill out an anonymous questionnaire made available to them.

**Confidentiality:** All information collected during the course of the interview is regarded as confidential and will not be used for any other purpose apart from that for which it has been collected.

**Voluntary Participation:** Your participation in this research is purely voluntary and highly appreciated. During the conduct of this study, you retain the right to withdraw at any time and for any reason. Should information from this research be published or presented, your anonymity will remain preserved. If any new information becomes available that may affect the risks or benefits associated with the study and/or consequently, your willingness to participate, you will be notified and may re-evaluate your decision to participate in the study.

**Statement of the person obtaining informed consent**

I have fully explained the research to the respondents and have provided adequate information to make an informed decision.

Date………………………… Signature………………………

**Statement of the person giving informed consent**

I have read the description of the research; I understand that my participation is voluntary. I know enough about the purpose, methods, risks, and benefits of the research study. I understand that I can opt out of the study at any time and for any reason. I hereby give my informed consent and choose to participate in this study.

Date ………………………… Signature………………………

**The Researcher’s Contact Details:**

Olumide A. Noah

+2349092285682

noaholumide99@gmail.com

College of Medicine, University of Lagos

**The Lagos University Teaching Hospital (LUTH) Health Research Ethics Committee:**

Room 107, First floor, Administrative Block, LUTH

**APPENDIX 2**

QUESTIONNAIRE

I am **Olumide A. Noah,** a fifth-year medical student at the College of Medicine, University of Lagos. I am conducting a study on**Knowledge, attitude, and utilization of mental health services among undergraduates at the University of Lagos, Nigeria: a cross-sectional study,**academic research, in partial fulfillment for the award of Bachelor of Medicine; Bachelor of Surgery degree (MB; BS). Kindly complete this questionnaire as sincerely and accurately as possible. The information you provide was treated as confidential and used for research purposes only. Identifiers such as your name or phone number will not be required to complete this questionnaire. **Participation in this study is completely voluntary.**

If you have any enquires about this study, you can contact the Principal Investigator, Olumide A. Noah via [noaholumide99@gmail.com](mailto:noaholumide99@gmail.com) or +2349092285682

Thank you for your cooperation.

I hereby consent to filling out this questionnaire. Participant Questionnaire No.

…………………………………

…………………………………

Respondents’ Signature & Date

**SECTION A: Socio-demographic characteristics**

*Please tick the appropriate box or fill in the required space.*

1. Age [*at last birthday*] (in years): _______
2. Gender: (a) Female (b) Male
3. Department: (a) Medical Laboratory Sciences (b) Science Education (c) English (d) Cell biology and Genetics (e) Medicine and Surgery
4. Level/Year of Study: (a) 100 L (b) 200 L (c) 300 L (d) 400L (e) 500L
5. Religion: (a) Islam (b) Christianity (c) Traditional (d) Others [*please specify*]_______
6. Ethnicity: (a) Yoruba (b) Igbo (c) Hausa (d) Others [*please specify*]_______
7. Highest level of education: (a) Completed secondary school (High school) (b) Advanced Level (c) Tertiary Degree

**SECTION B: Knowledge of Mental Health Services (MHS)**

*Please tick where appropriate.*

| **S/N** | **Knowledge of this statement** | **Extensive knowledge** | **Moderate knowledge** | **Limited knowledge** | **No Knowledge** |
| --- | --- | --- | --- | --- | --- |
| 8. | Classified medical/behavioral mental health or psychological disorders (e.g., depression, anxiety, schizophrenia, etc.)? |  |  |  |  |
| 9. | The type of treatment models/clinical interventions (e.g., psychotherapy) used in  professional mental health clinics? |  |  |  |  |
| 10. | How to get professional mental health or psychological counseling services when  needed (e.g., procedures and requirements)? |  |  |  |  |
| 11. | Common drug treatments prescribed to individuals with mental health or  psychological problem? |  |  |  |  |
| 12. | Your eligibility for mental health care under your current health insurance plan? |  |  |  |  |

13. Are you aware that mental health services exist in Lagos? (a)Yes (b)No

14. Source of knowledge on mental health services (choose as many as apply)

a. Television

b. Radio

c. Billboard

d. Internet

e. Friends

f. Lectures

15. Which of these psychiatric health facilities do you know about? (Choose as many as apply)

a. Federal Neuropsychiatric Hospital, Yaba

b. Psychiatric Clinic, LUTH

c. Psychiatric Clinic, LASUTH

d. Prison Asylum

e. None

**SECTION C: Attitude towards Mental Health Services (MHS)**

| S/N | Statements | Strongly agree | Agree | Disagree | Strongly disagree |
| --- | --- | --- | --- | --- | --- |
| 16. | I feel I can get professional help if I was having a mental breakdown |  |  |  |  |
| 17. | When I am emotionally disturbed, I prefer solving it on my own |  |  |  |  |
| 18. | I feel comfortable talking about my personal problems |  |  |  |  |
| 19. | If I am mentally disturbed, I don't see it as my personal matter but also a threat to my friends and family |  |  |  |  |
| 20. | I do not use mental health services in school because of the belief that culture has on the mentally ill individuals |  |  |  |  |
| 21. | I feel the treatment young people receive at mental health clinics in my school make them talk gibberish |  |  |  |  |
| 22. | I think individuals diagnosed as mentally ill in mental clinics in my school suffer from its symptoms throughout their life |  |  |  |  |

**SECTION C: Utilization of Mental Health Services (MHS)**

| S/N | Statements | Never | Rarely | Occasionally | Always |
| --- | --- | --- | --- | --- | --- |
| 23. | How often do you use mental health services |  |  |  |  |
| 24. | I am restricted to the use of mental health services due to the lack of qualified mental health personnel |  |  |  |  |
| 25. | I discuss my personal issues with the mental health specialist |  |  |  |  |
| 26. | The health professionals are receptive to my needs |  |  |  |  |
